# Supplementary material for: Application of ground penetrating radar to geological investigations
Source: PeerJ journal article supplement (doi:10.7717/peerj.14731), 2004-01-01

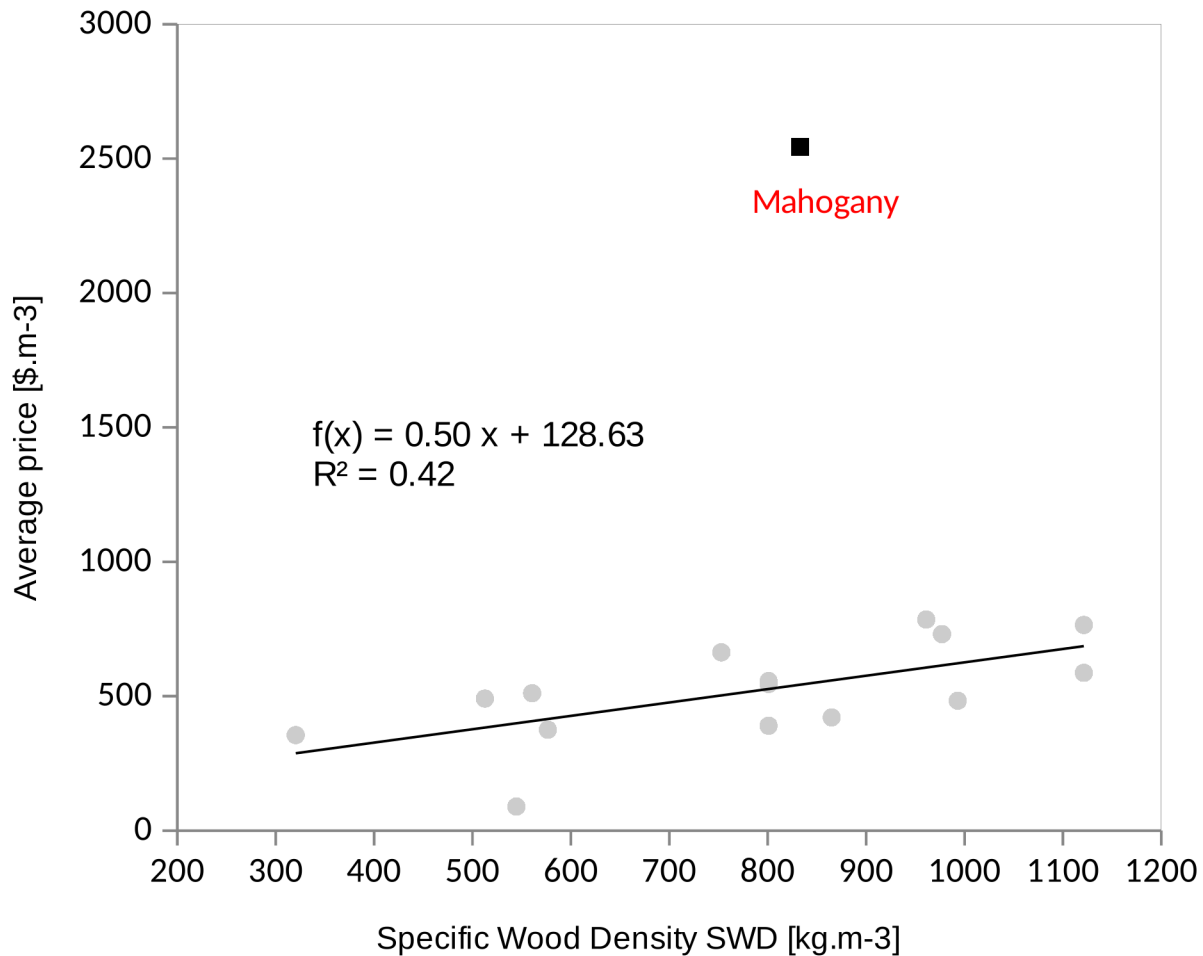

Supplement: FigureS2.pdf [file FigureS2.pdf]
