# Supplementary material for: Application of ground penetrating radar to geological investigations
Source: PeerJ journal article supplement (doi:10.7717/peerj.14731), 2004-01-01

0 %

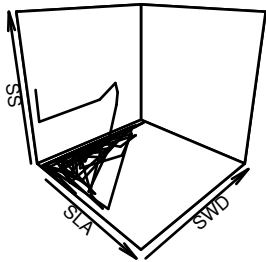

12.5 %

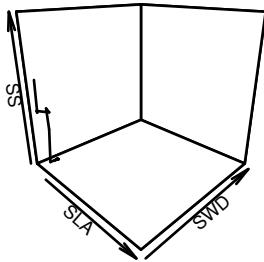

25 %

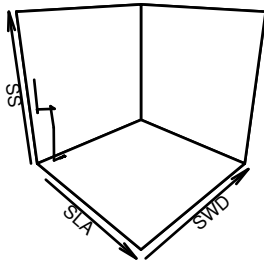

37.5 %

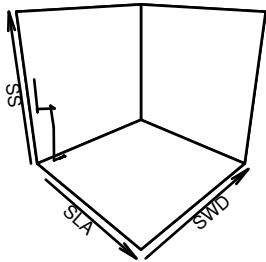

50 %

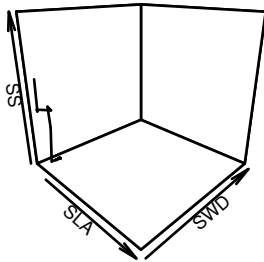

62.5 %

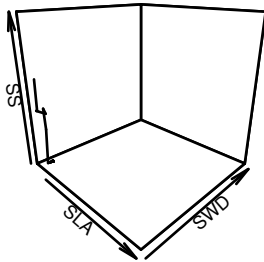

75 %

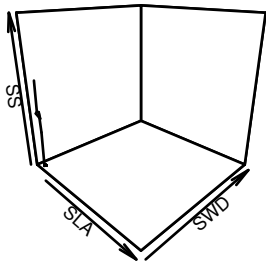

87.5 %

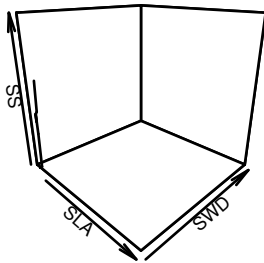

100 %

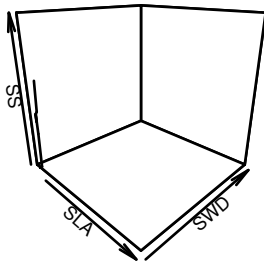

Supplement: FigureS4.1.pdf [file FigureS4.1.pdf]
