# Supplementary material for: Some fundamental elements for studying social-ecological co-existence in forest common pool resources
Source: PeerJ. 2023 Feb 27;11:e14731. doi: 10.7717/peerj.14731 (PMC9979833; doi:10.7717/peerj.14731)
Supplement: Supplemental Information 2 — Data from Fig. S3 originally comes from unpublished data used by Ahmed & Ewers (2012), and were graciously provided with permission by Dr. Sadia Ahmed. Dr. Ahmed only provided the identity of the Mahogany species. [file peerj-11-14731-s002.xlsx]

## Sheet: FigureS2
Average price [$.m-3]	density [lb/ft]	Specific Wood Density SWD [kg.m-3]	Species (only Mahogany sp. provided by original author of data)
355	20	320.369
587	70	1121.29
556	50	800.923
375	36	576.665
785	60	961.108
89	34	544.628
491	32	512.591
483	62	993.145
731	61	977.126
765	70	1121.29
390	50	800.923
663	47	752.868
421	54	864.997
511	35	560.646
545	50	800.923
2544	52	832.96	mahogany
