# Supplementary material for: Application of ground penetrating radar to geological investigations
Source: PeerJ journal article supplement (doi:10.7717/peerj.14731), 2004-01-01
Supplement: Table.S1.pdf [file Table.S1.pdf]

| Forest type          | Dominant species             | Species-level<br>Timber density<br>[kg/m <sup>3</sup> ] | Approximate<br>forest-level<br>timber density<br>[kg/m <sup>3</sup> ] | a1 | m1   | b1       |
|----------------------|------------------------------|---------------------------------------------------------|-----------------------------------------------------------------------|----|------|----------|
| Spruce/Fir           | <i>Abies balsamea</i>        | 400                                                     | 435                                                                   | 1  | 1    | 4.10-4   |
|                      | <i>Picea rubens</i>          | 470                                                     |                                                                       |    |      |          |
| Aspen/Birch          | <i>Populus tremuloides</i>   | 450                                                     | 560                                                                   | 1  | 0.58 | 2.8.10-3 |
|                      | <i>Betula papyrifera</i>     | 660                                                     |                                                                       |    |      |          |
| Northern<br>Hardwood |                              | 635                                                     | 715                                                                   | 1  | 0.55 | 3.5.10-3 |
|                      | <i>Betula allaghaniensis</i> |                                                         |                                                                       |    |      |          |
|                      | <i>Fraxinus americana</i>    | 675                                                     |                                                                       |    |      |          |
|                      | <i>Fagus grandifolia</i>     | 720                                                     |                                                                       |    |      |          |
|                      | <i>Acer saccharum</i>        | 740                                                     |                                                                       |    |      |          |
| Oak                  | <i>Quercus velutina</i>      | 740                                                     | 760                                                                   | 1  | 0.4  | 4.9.10-3 |
|                      | <i>Quercus prinus</i>        | 765                                                     |                                                                       |    |      |          |
|                      | <i>Quercus alba</i>          | 770                                                     |                                                                       |    |      |          |
