# Supplementary material for: Application of ground penetrating radar to geological investigations
Source: PeerJ journal article supplement (doi:10.7717/peerj.14731), 2004-01-01
Supplement: Table.S2.pdf [file Table.S2.pdf]

| Forest type          | Dominant species                 | Species-level<br>Timber density<br>[kg/m3] | Approximate<br>forest-level  |       |         |       |
|----------------------|----------------------------------|--------------------------------------------|------------------------------|-------|---------|-------|
|                      |                                  |                                            | timber<br>density<br>[kg/m3] | a2    | m2      | b2    |
| Spruce/Fir           | <i>Abies balsamea</i>            | 400                                        | 435                          | 39.98 | -0.001  | 1     |
|                      | <i>Picea rubens</i>              | 470                                        |                              |       |         |       |
| Aspen/Birch          | <i>Populus tremuloides</i>       | 450                                        | 560                          | 47.77 | -0.0021 | 1     |
|                      | <i>Betula papyrifera</i>         | 660                                        |                              |       |         |       |
| Northern<br>Hardwood | <i>Betula<br/>allaghaniensis</i> | 635                                        | 715                          | 79.15 | 0.304   | 0.199 |
|                      | <i>Fraxinus americana</i>        | 675                                        |                              |       |         |       |
|                      | <i>Fagus grandifolia</i>         | 720                                        |                              |       |         |       |
|                      | <i>Acer saccharum</i>            | 740                                        |                              |       |         |       |
| Oak                  | <i>Quercus velutina</i>          | 740                                        | 750                          | 43.27 | 0.106   | 0.177 |
|                      | <i>Quercus prinus</i>            | 765                                        |                              |       |         |       |
|                      | <i>Quercus alba</i>              | 770                                        |                              |       |         |       |
