# Supplementary material for: Application of ground penetrating radar to geological investigations
Source: PeerJ journal article supplement (doi:10.7717/peerj.14731), 2004-01-01
Supplement: Table.S3.pdf [file Table.S3.pdf]

| Species name                   | $\mu$ | $\alpha$ | $\beta$ | $\gamma$ | Timber density [kg/m <sup>3</sup> ] | Mass of seeds produced [kg] |
|--------------------------------|-------|----------|---------|----------|-------------------------------------|-----------------------------|
| <i>Abies balsamea</i>          | 42.54 | 1.75     | 0.0014  | 0.93     | 400                                 | 6.6.10 <sup>-6</sup>        |
| <i>Pinus strobus</i>           | 43.36 | 1.02     | 0.0141  | 1        | 410                                 | 1.9.10 <sup>-5</sup>        |
| <i>Tilia americana</i>         | 44.07 | 1.19     | 0.0082  | 1        | 425                                 | 3.1.10 <sup>-5</sup>        |
| <i>Tsuga canadensis</i>        | 42.2  | 1.65     | 0.0011  | 0.97     | 450                                 | 1.0.10 <sup>-5</sup>        |
| <i>Populus tremuloides</i>     | 36.73 | 1.36     | 0.0064  | 1        | 450                                 | 1.5.10 <sup>-7</sup>        |
| <i>Picea rubens</i>            | 39.45 | 1.85     | 0.0008  | 0.89     | 470                                 | 2.3.10 <sup>-6</sup>        |
| <i>Pinus taeda</i>             | 33.98 | 1.99     | 0.0006  | 0.84     | 470                                 | 2.5.10 <sup>-5</sup>        |
| <i>Liriodendron tulipifera</i> | 47.32 | 2.22     | 0.0002  | 0.91     | 515                                 | 3.9.10 <sup>-5</sup>        |
| <i>Liquidambar styraciflua</i> | 49.76 | 1        | 0.0322  | 1        | 545                                 | 5.5.10 <sup>-6</sup>        |
| <i>Acer rubrum</i>             | 42.12 | 1.92     | 0.0005  | 0.94     | 550                                 | 2.0.10 <sup>-5</sup>        |
| <i>Prunus serotina</i>         | 54.13 | 2.78     | 0.001   | 0.78     | 595                                 | 9.4.10 <sup>-5</sup>        |
| <i>Betula alleghaniensis</i>   | 45.29 | 1.45     | 0.0035  | 0.99     | 636                                 | 10 <sup>-5</sup>            |
| <i>Betula papyrifera</i>       | 38.81 | 1        | 0.0183  | 1        | 660                                 | 3.10 <sup>-7</sup>          |
| <i>Fraxinus americana</i>      | 48.77 | 2.09     | 0.0002  | 0.89     | 675                                 | 3.3.10 <sup>-5</sup>        |
| <i>Quercus rubra</i>           | 46.25 | 1.89     | 0.0005  | 0.91     | 670                                 | 7.5.10 <sup>-5</sup>        |
| <i>Fagus grandifolia</i>       | 40.75 | 1.57     | 0.0016  | 0.95     | 720                                 | 2.5.10 <sup>-4</sup>        |
| <i>Acer saccharum</i>          | 42.12 | 1.39     | 0.0035  | 0.94     | 740                                 | 4.8.10 <sup>-5</sup>        |
| <i>Quercus velutina</i>        | 46.7  | 1.48     | 0.0028  | 0.91     | 740                                 | 1.9.10 <sup>-3</sup>        |
| <i>Quercus prinus</i>          | 47.21 | 2.78     | 0.00001 | 0.86     | 765                                 | 4.5.10 <sup>-3</sup>        |
| <i>Quercus alba</i>            | 47.83 | 2.8      | 0.00001 | 0.88     | 770                                 | 3.8.10 <sup>-3</sup>        |
| <i>Populus grandidentata</i>   | 34.18 | 1.45     | 0.0041  | 0.99     | 880                                 | 1.8.10 <sup>-7</sup>        |
